# Supplementary material for: AHSA1 promotes proliferation and EMT by regulating ERK/CALD1 axis in hepatocellular carcinoma
Source: Research Square preprint supplement (doi:10.21203/rs.3.rs-1626018/v1), 2022-06-09
Supplement: Supplementary file 1 [file a52c08159f2087858e6179cd.docx]

| Correlation between AHSA1 expression in tumor tissues  and clinicopathological characteristics of patients with liver cancer | | | | | | |
| --- | --- | --- | --- | --- | --- | --- |
|  |  | Patients | AHSA1 expression(%) | |  |  |
| Variables |  | 90 | Low expression | High expression | *P*-value | |
| Gender |  |  |  |  |  |  |
|  | Male | 80 | 31 | 49 | 0.330 | |
|  | Female | 10 | 5 | 4 |  |  |
| Age |  |  |  |  |  |  |
|  | ≥60 | 22 | 9 | 13 | 0.920 | |
|  | ＜60 | 68 | 27 | 41 |  |  |
| HbsAg |  |  |  |  |  |  |
|  | Positive | 70 | 25 | 45 | 0.081 | |
|  | Negative | 19 | 11 | 8 |  |  |
| HCVAb |  |  |  |  |  |  |
|  | Positive | 80 | 33 | 47 | 0.934 | |
|  | Negative | 7 | 3 | 4 |  |  |
| AFP |  |  |  |  |  |  |
|  | ≥400 | 32 | 13 | 19 | 0.604 | |
|  | ＜400 | 57 | 20 | 37 |  |  |
| ALT |  |  |  |  |  |  |
|  | ≥100 | 7 | 3 | 4 | 0.892 | |
|  | ＜100 | 82 | 33 | 49 |  |  |
| TBiL |  |  |  |  |  |  |
|  | ≥17.1 | 24 | 8 | 16 | 0.406 | |
|  | ＜17.1 | 65 | 28 | 37 |  |  |
| Primary tumor (T) | |  |  |  |  |  |
|  | T1 | 63 | 27 | 36 | 0.320 | |
|  | T2 | 24 | 9 | 15 |  |  |
|  | T3 | 3 | 0 | 3 |  |  |
| Tumor size（cm） | |  |  |  |  |  |
|  | ≥4 | 48 | 17 | 31 | 0.343 | |
|  | ＜4 | 42 | 19 | 23 |  |  |
| recrudescence |  |  |  |  |  |  |
|  | Yes | 48 | 11 | 37 | **＜0.001** | |
|  | No | 41 | 25 | 16 |  |  |

A χ2 test or Fisher’s exact test was applied to access the associations between the expression of

EFNA4 and the clinicopathologic characteristics of liver cancer patients.
